# Supplementary material for: Genomic variants in the FTO gene are associated with sporadic amyotrophic lateral sclerosis in Greek patients
Source: PubMed Central journal article supplement (PMC5721583; doi:10.1186/s40246-017-0126-2), 2017-12-08
Supplement: 40246_2017_126_MOESM1_ESM.pdf [file 40246_2017_126_MOESM1_ESM.pdf]

## Supplementary Information

### Genomic variants in the *FTO* gene are associated with sporadic amyotrophic lateral sclerosis in Greek patients

Konstantinos Mitropoulos<sup>1,#</sup>, Eleni Merkouri Papadima<sup>2,#,%</sup>, Georgia Xiromerisiou<sup>3</sup>, Angeliki Balasopoulou<sup>2</sup>, Kyriaki Charalampidou<sup>2</sup>, Vasiliki Galani<sup>2</sup>, Krystallia-Vassiliki Zafeiri<sup>2</sup>, Efthymios Dardiotis<sup>3</sup>, Styliani Ralli<sup>3</sup>, Georgia Deretzi<sup>4</sup>, Anne John<sup>5</sup>, Kyriaki Kydonopoulou<sup>6</sup>, Elpida Papadopoulou<sup>6</sup>, Alba di Pardo<sup>7</sup>, Fulya Akcimen<sup>8</sup>, Annalisa Loizedda<sup>9,10</sup>, Valerija Dobričić<sup>11</sup>, Ivana Novaković<sup>11,12</sup>, Vladimir S. Kostić<sup>11</sup>, Clint Mizzi<sup>2</sup>, Brock A. Peters<sup>13,14</sup>, A. Nazli Basak<sup>8</sup>, Sandro Orrù<sup>9</sup>, Evangelos Kiskinis<sup>7</sup>, David N. Cooper<sup>15</sup>, Spyridon Gerou<sup>6</sup>, Radoje Drmanac<sup>13</sup>, Marina Bartsakoulia<sup>2</sup>, Evangelia-Eirini Tsermpini<sup>2</sup>, George M. Hadjigeorgiou<sup>3</sup>, Bassam R. Ali<sup>5</sup>, Theodora Katsila<sup>2</sup>, George P. Patrinos<sup>2,5,\*</sup>

<sup>1</sup> National and Kapodistrian University of Athens School of Medicine, Athens, Greece;

<sup>2</sup> Department of Pharmacy, University of Patras School of Health Sciences, Patras, Greece;

<sup>3</sup> School of Medicine, University of Thessaly, Larisa, Greece;

<sup>4</sup> Papageorgiou hospital, Thessaloniki, Greece;

<sup>5</sup> United Arab Emirates University, College of Medicine and Health Sciences, Department of Pathology, Al-Ain, UAE;

<sup>6</sup> ANALYSI Diagnostic Laboratories S.A., Thessaloniki, Greece;

<sup>7</sup> Departments of Neurology and Physiology, Northwestern University Feinberg School of Medicine, Chicago, IL, USA;

<sup>8</sup> Bogazici University, Suna and Inan Kirac Foundation, NDAL, Istanbul, Turkey;

<sup>9</sup> University of Cagliari, Department of Medical Sciences and Public Health, Cagliari, Italy;

<sup>10</sup> CNR IRGB, Cagliari, Italy;

<sup>11</sup> Institute of Neurology CCS, School of Medicine, University of Belgrade, Belgrade, Serbia;

<sup>12</sup> Faculty of Medicine, University of Belgrade, Institute of Human Genetics, Belgrade, Serbia;

<sup>13</sup> Complete Genomics Inc, Mountain View, CA, USA;

<sup>14</sup> BGI Shenzhen, Shenzhen, People's Republic of China;

<sup>15</sup> Cardiff University, Institute of Medical Genetics, Cardiff, UK

<sup>#</sup> These authors contributed equally to this work

<sup>%</sup> Present address: University of Cagliari, School of Medicine, Department of Biomedical Sciences, Cagliari, Italy

**Supplementary Table 1.** Statistical and Hardy-Weinberg analyses on the genotyping data of sALS patients and healthy individuals of Greek origin.

| SNP        | Tests for deviation from Hardy-Weinberg equilibrium                                                                                                       |                                                                                                                                                             | Tests for association (C.I.: 95% confidence interval)                 |                                                                     |                                                                   |                                                                     |                                                                  |
|------------|-----------------------------------------------------------------------------------------------------------------------------------------------------------|-------------------------------------------------------------------------------------------------------------------------------------------------------------|-----------------------------------------------------------------------|---------------------------------------------------------------------|-------------------------------------------------------------------|---------------------------------------------------------------------|------------------------------------------------------------------|
|            | Controls                                                                                                                                                  | Cases                                                                                                                                                       | allele freq. difference                                               | heterozygous                                                        | homozygous                                                        | allele positivity                                                   | Armitage's trend test                                            |
| rs17217144 | n11=4 (17.54)<br>n12=59 (31.93)<br>n22=1 (14.54)<br>f_a1=0.52 +/-0.017<br>F=-0.84781<br>p=1.181e-11 (Pearson)<br>p=1.048e-13 (Llr)<br>p=1.711e-12 (Exact) | n11=30 (48.60)<br>n12=102 (64.80)<br>n22=3 (21.60)<br>f_a1=0.60 +/-0.019<br>F=-0.57407<br>p=2.556e-11 (Pearson)<br>p=6.278e-13 (Llr)<br>p=3.652e-12 (Exact) | Risk allele 2                                                         |                                                                     |                                                                   |                                                                     |                                                                  |
|            |                                                                                                                                                           |                                                                                                                                                             | [1]<->[2]                                                             | [11]<->[12]                                                         | [11+]<->[22]                                                      | [11]<->[12+22]                                                      | common odds ratio                                                |
|            |                                                                                                                                                           |                                                                                                                                                             | Odds_ratio=0.732<br>C.I.=[0.479-1.119]<br>chi2=2.08<br>p=0.14891 (P)  | Odds_ratio=0.231<br>C.I.=[0.077-0.687]<br>chi2=7.95<br>p=0.00482    | Odds_ratio=0.400<br>C.I.=[0.033-4.834]<br>chi2=0.55<br>p=0.45886  | Odds_ratio=0.233<br>C.I.=[0.078-0.694]<br>chi2=7.82<br>p=0.00517    | Odds_ratio=0.379<br>chi2=6.05<br>p=0.01390                       |
|            |                                                                                                                                                           |                                                                                                                                                             | Risk allele 1                                                         |                                                                     |                                                                   |                                                                     |                                                                  |
|            |                                                                                                                                                           |                                                                                                                                                             | [2]<->[1]                                                             | [22]<->[12]                                                         | [22]<->[11]                                                       | [11+12]<->[22]                                                      | common odds ratio                                                |
|            |                                                                                                                                                           |                                                                                                                                                             | Odds_ratio=1.366<br>C.I.=[0.894-2.086]<br>chi2=2.08<br>p=0.14891 (P)  | Odds_ratio=0.576<br>C.I.=[0.059-5.667]<br>chi2=0.23<br>p=0.63244    | Odds_ratio=2.500<br>C.I.=[0.207-30.215]<br>chi2=0.55<br>p=0.45886 | Odds_ratio=0.698<br>C.I.=[0.071-6.849]<br>chi2=0.10<br>p=0.75676    | Odds_ratio=2.490<br>chi2=6.05<br>p=0.01390                       |
| rs2892469  | n11=10 (7.85)<br>n12=15 (19.29)<br>n22=14 (11.85)<br>f_a1=0.45 +/-0.062<br>F=-0.22259<br>p=0.164504 (Pearson)<br>p=0.163279 (Llr)<br>p=0.196593 (Exact)   | n11=30 (34.26)<br>n12=79 (70.49)<br>n22=32 (36.26)<br>f_a1=0.49 +/-0.028<br>F=-0.12079<br>p=0.151476 (Pearson)<br>p=0.150969 (Llr)<br>p=0.180121 (Exact)    | Risk allele 2                                                         |                                                                     |                                                                   |                                                                     |                                                                  |
|            |                                                                                                                                                           |                                                                                                                                                             | [1]<->[2]                                                             | [11]<->[12]                                                         | [11+]<->[22]                                                      | [11]<->[12+22]                                                      | common odds ratio                                                |
|            |                                                                                                                                                           |                                                                                                                                                             | Odds_ratio=0.837<br>C.I.=[0.506-1.386]<br>chi2=0.48<br>p=0.48943 (P)  | Odds_ratio=1.756<br>C.I.=[0.711-4.335]<br>chi2=1.51<br>p=0.21886    | Odds_ratio=0.762<br>C.I.=[0.294-1.974]<br>chi2=0.31<br>p=0.57517  | Odds_ratio=1.276<br>C.I.=[0.560-2.909]<br>chi2=0.34<br>p=0.56175    | Odds_ratio=0.855<br>C.I.=[0.560-2.909]<br>chi2=0.50<br>p=0.47923 |
|            |                                                                                                                                                           |                                                                                                                                                             | Risk allele 1                                                         |                                                                     |                                                                   |                                                                     |                                                                  |
|            |                                                                                                                                                           |                                                                                                                                                             | [2]<->[1]                                                             | [22]<->[12]                                                         | [22]<->[11]                                                       | [11+12]<->[22]                                                      | common odds ratio                                                |
|            |                                                                                                                                                           |                                                                                                                                                             | Odds_ratio=1.194<br>C.I.=[0.722-1.976]<br>chi2=0.48<br>p=0.48943 (P)  | Odds_ratio=2.304<br>C.I.=[0.999-5.317]<br>chi2=3.94<br>p=0.04711    | Odds_ratio=1.312<br>C.I.=[0.506-3.401]<br>chi2=0.31<br>p=0.57517  | Odds_ratio=1.907<br>C.I.=[0.889-4.094]<br>chi2=2.80<br>p=0.09432    | Odds_ratio=1.167<br>chi2=0.50<br>p=0.47923                       |
| rs7186521  | n11=0 (12.25)<br>n12=49 (24.50)<br>n22=0 (12.25)<br>f_a1=0.50 +/-0.000<br>F=-1.00000<br>p=2.560e-12 (Pearson)<br>p=1.695e-16 (Llr)<br>p=2.210e-14 (Exact) | n11=24 (9.46)<br>n12=24 (53.08)<br>n22=89 (74.46)<br>f_a1=0.26 +/-0.033<br>F=0.54785<br>p=1.432e-10 (Pearson)<br>p=5.947e-10 (Llr)<br>p=7.520e-10 (Exact)   | Risk allele 2                                                         |                                                                     |                                                                   |                                                                     |                                                                  |
|            |                                                                                                                                                           |                                                                                                                                                             | [1]<->[2]                                                             | [11]<->[12]                                                         | [11+]<->[22]                                                      | [11]<->[12+22]                                                      | common odds ratio                                                |
|            |                                                                                                                                                           |                                                                                                                                                             | Odds_ratio=2.806<br>C.I.=[1.738-4.528]<br>chi2=18.51<br>p=0.00002 (P) | Odds_ratio=0.010<br>C.I.=[0.001-0.173]<br>chi2=32.55<br>p=1.159e-08 | Odds_ratio=3.653<br>C.I.=[0.071-188.837]<br>chi2=nan<br>p=1.00000 | Odds_ratio=0.047<br>C.I.=[0.003-0.785]<br>chi2=9.86<br>p=0.00169    | Odds_ratio=2.184<br>chi2=16.74<br>p=0.00004                      |
|            |                                                                                                                                                           |                                                                                                                                                             | Risk allele 1                                                         |                                                                     |                                                                   |                                                                     |                                                                  |
|            |                                                                                                                                                           |                                                                                                                                                             | [2]<->[1]                                                             | [22]<->[12]                                                         | [22]<->[11]                                                       | [11+12]<->[22]                                                      | common odds ratio                                                |
|            |                                                                                                                                                           |                                                                                                                                                             | Odds_ratio=0.356<br>C.I.=[0.221-0.575]<br>chi2=18.51<br>p=0.00002 (P) | Odds_ratio=0.003<br>C.I.=[0.000-0.046]<br>chi2=85.64<br>p=2.154e-20 | Odds_ratio=0.274<br>C.I.=[0.005-14.151]<br>chi2=nan<br>p=1.00000  | Odds_ratio=0.005<br>C.I.=[0.000-0.091]<br>chi2=61.04<br>p=5.596e-15 | Odds_ratio=0.456<br>chi2=16.74<br>p=0.00004                      |
| rs1861869  | n11=8 (6.16)<br>n12=15 (18.68)<br>n22=16 (14.16)<br>f_a1=0.40 +/-0.061<br>F=-0.19698<br>p=0.218645 (Pearson)<br>p=0.219340 (Llr)<br>p=0.312376 (Exact)    | n11=24 (27.46)<br>n12=76 (69.09)<br>n22=40 (43.46)<br>f_a1=0.44 +/-0.028<br>F=-0.10008<br>p=0.236336 (Pearson)<br>p=0.235483 (Llr)<br>p=0.304045 (Exact)    | Risk allele 2                                                         |                                                                     |                                                                   |                                                                     |                                                                  |
|            |                                                                                                                                                           |                                                                                                                                                             | [1]<->[2]                                                             | [11]<->[12]                                                         | [11+]<->[22]                                                      | [11]<->[12+22]                                                      | common odds ratio                                                |
|            |                                                                                                                                                           |                                                                                                                                                             | Odds_ratio=0.830<br>C.I.=[0.498-1.383]<br>chi2=0.51<br>p=0.47399 (P)  | Odds_ratio=1.689<br>C.I.=[0.638-4.469]<br>chi2=1.13<br>p=0.28788    | Odds_ratio=0.833<br>C.I.=[0.310-2.238]<br>chi2=0.13<br>p=0.71745  | Odds_ratio=1.247<br>C.I.=[0.511-3.046]<br>chi2=0.24<br>p=0.62714    | Odds_ratio=0.869<br>chi2=0.53<br>p=0.46600                       |
|            |                                                                                                                                                           |                                                                                                                                                             | Risk allele 1                                                         |                                                                     |                                                                   |                                                                     |                                                                  |
|            |                                                                                                                                                           |                                                                                                                                                             | [2]<->[1]                                                             | [22]<->[12]                                                         | [22]<->[11]                                                       | [11+12]<->[22]                                                      | common odds ratio                                                |
|            |                                                                                                                                                           |                                                                                                                                                             | Odds_ratio=1.205<br>C.I.=[0.723-2.009]<br>chi2=0.51<br>p=0.47399 (P)  | Odds_ratio=2.027<br>C.I.=[0.909-4.518]<br>chi2=3.04<br>p=0.08104    | Odds_ratio=1.200<br>C.I.=[0.447-3.223]<br>chi2=0.13<br>p=0.71745  | Odds_ratio=1.739<br>C.I.=[0.833-3.630]<br>chi2=2.20<br>p=0.13794    | Odds_ratio=1.148<br>chi2=0.53<br>p=0.46600                       |
| rs6850200  | n11=9 (8.04)<br>n12=27 (28.93)<br>n22=27 (26.04)<br>f_a1=0.36 +/-0.044<br>F=0.06667<br>p=0.596701 (Pearson)<br>p=0.597914 (Llr)<br>p=0.589957 (Exact)     | n11=15 (16.68)<br>n12=67 (63.63)<br>n22=59 (60.68)<br>f_a1=0.34 +/-0.028<br>F=-0.05288<br>p=0.530030 (Pearson)<br>p=0.528265 (Llr)<br>p=0.580852 (Exact)    | Risk allele 2                                                         |                                                                     |                                                                   |                                                                     |                                                                  |
|            |                                                                                                                                                           |                                                                                                                                                             | [1]<->[2]                                                             | [11]<->[12]                                                         | [11+]<->[22]                                                      | [11]<->[12+22]                                                      | common odds ratio                                                |
|            |                                                                                                                                                           |                                                                                                                                                             | Odds_ratio=1.060<br>C.I.=[0.683-1.644]<br>chi2=0.07<br>p=0.79638 (P)  | Odds_ratio=1.489<br>C.I.=[0.582-3.809]<br>chi2=0.69<br>p=0.40459    | Odds_ratio=1.311<br>C.I.=[0.510-3.368]<br>chi2=0.32<br>p=0.57305  | Odds_ratio=1.400<br>C.I.=[0.577-3.395]<br>chi2=0.56<br>p=0.45505    | Odds_ratio=1.096<br>chi2=0.07<br>p=0.79483                       |
|            |                                                                                                                                                           |                                                                                                                                                             | Risk allele 1                                                         |                                                                     |                                                                   |                                                                     |                                                                  |
|            |                                                                                                                                                           |                                                                                                                                                             | [2]<->[1]                                                             | [22]<->[12]                                                         | [22]<->[11]                                                       | [11+12]<->[22]                                                      | common odds ratio                                                |
|            |                                                                                                                                                           |                                                                                                                                                             | Odds_ratio=0.944<br>C.I.=[0.608-1.465]<br>chi2=0.07<br>p=0.79638 (P)  | Odds_ratio=1.136<br>C.I.=[0.600-2.149]<br>chi2=0.15<br>p=0.69598    | Odds_ratio=0.763<br>C.I.=[0.297-1.959]<br>chi2=0.32<br>p=0.57305  | Odds_ratio=1.042<br>C.I.=[0.572-1.901]<br>chi2=0.02<br>p=0.89230    | Odds_ratio=0.915<br>chi2=0.07<br>p=0.79483                       |

(Pearson): Pearson's goodness-of-fit chi-square (degrees of freedom=1); (Llr): Log likelihood ratio chi-square (degrees of freedom=1); (Exact): Fisher's Exact test PA, PB: two-tailed p-values; if P, then PA=PB

**Supplementary Table 2.** Statistical and Hardy-Weinberg analyses on the genotyping data of sALS patients and healthy individuals of Sardinian origin.

| SNP        | Tests for deviation from Hardy-Weinberg equilibrium                                                                                                                 |                                                                                                                                                                     | Tests for association (C.I.: 95% confidence interval)                |                                                                  |                                                                  |                                                                  |                                            |
|------------|---------------------------------------------------------------------------------------------------------------------------------------------------------------------|---------------------------------------------------------------------------------------------------------------------------------------------------------------------|----------------------------------------------------------------------|------------------------------------------------------------------|------------------------------------------------------------------|------------------------------------------------------------------|--------------------------------------------|
|            | Controls                                                                                                                                                            | Cases                                                                                                                                                               | allele freq. difference                                              | heterozygous                                                     | homozygous                                                       | allele positivity                                                | Armitage's trend test                      |
| rs6850200  | n11=17 (13.29)<br>n12=34 (41.43)<br>n22=36 (32.29)<br>f <sub>a</sub> 1=0.39 +/-0.040<br>F=0.17925<br>p=0.094546 (Pearson)<br>p=0.095316 (Llr)<br>p=0.113989 (Exact) | n11=17 (16.22)<br>n12=52 (53.56)<br>n22=45 (44.22)<br>f <sub>a</sub> 1=0.38 +/-0.033<br>F=0.02915<br>p=0.755607 (Pearson)<br>p=0.755876 (Llr)<br>p=0.841794 (Exact) | Risk allele 2                                                        |                                                                  |                                                                  |                                                                  |                                            |
|            |                                                                                                                                                                     |                                                                                                                                                                     | [1]<->[2]                                                            | [11]<->[12]                                                      | [11+]<->[22]                                                     | [11]<->[12+22]                                                   | common odds ratio                          |
|            |                                                                                                                                                                     |                                                                                                                                                                     | Odds_ratio=1.059<br>C.I.=[0.706-1.589]<br>chi2=0.08<br>p=0.78090 (P) | Odds_ratio=1.529<br>C.I.=[0.688-3.401]<br>chi2=1.09<br>p=0.29603 | Odds_ratio=1.250<br>C.I.=[0.560-2.789]<br>chi2=0.30<br>p=0.58547 | Odds_ratio=1.386<br>C.I.=[0.662-2.902]<br>chi2=0.75<br>p=0.38585 | Odds_ratio=1.083<br>chi2=0.07<br>p=0.79037 |
|            |                                                                                                                                                                     |                                                                                                                                                                     | Risk allele 1                                                        |                                                                  |                                                                  |                                                                  |                                            |
|            |                                                                                                                                                                     |                                                                                                                                                                     | [2]<->[1]                                                            | [22]<->[12]                                                      | [22]<->[11]                                                      | [11+12]<->[22]                                                   | common odds ratio                          |
|            |                                                                                                                                                                     |                                                                                                                                                                     | Odds_ratio=0.944<br>C.I.=[0.629-1.416]<br>chi2=0.08<br>p=0.78090 (P) | Odds_ratio=1.224<br>C.I.=[0.661-2.264]<br>chi2=0.41<br>p=0.52047 | Odds_ratio=0.800<br>C.I.=[0.359-1.785]<br>chi2=0.30<br>p=0.58547 | Odds_ratio=1.082<br>C.I.=[0.613-1.911]<br>chi2=0.07<br>p=0.78492 | Odds_ratio=0.925<br>chi2=0.07<br>p=0.79037 |
| rs2892469  | n11=32 (27.11)<br>n12=32 (41.79)<br>n22=21 (16.11)<br>f <sub>a</sub> 1=0.56 +/-0.042<br>F=0.23423<br>p=0.030809 (Pearson)<br>p=0.030392 (Llr)<br>p=0.029812 (Exact) | n11=32 (27.27)<br>n12=42 (51.46)<br>n22=29 (24.27)<br>f <sub>a</sub> 1=0.51 +/-0.038<br>F=0.18377<br>p=0.062168 (Pearson)<br>p=0.061449 (Llr)<br>p=0.075147 (Exact) | Risk allele 2                                                        |                                                                  |                                                                  |                                                                  |                                            |
|            |                                                                                                                                                                     |                                                                                                                                                                     | [1]<->[2]                                                            | [11]<->[12]                                                      | [11+]<->[22]                                                     | [11]<->[12+22]                                                   | common odds ratio                          |
|            |                                                                                                                                                                     |                                                                                                                                                                     | Odds_ratio=1.224<br>C.I.=[0.814-1.841]<br>chi2=0.94<br>p=0.33178 (P) | Odds_ratio=1.312<br>C.I.=[0.670-2.570]<br>chi2=0.63<br>p=0.42735 | Odds_ratio=1.381<br>C.I.=[0.655-2.910]<br>chi2=0.72<br>p=0.39544 | Odds_ratio=1.340<br>C.I.=[0.731-2.455]<br>chi2=0.90<br>p=0.34339 | Odds_ratio=1.179<br>chi2=0.78<br>p=0.37729 |
|            |                                                                                                                                                                     |                                                                                                                                                                     | Risk allele 1                                                        |                                                                  |                                                                  |                                                                  |                                            |
|            |                                                                                                                                                                     |                                                                                                                                                                     | [2]<->[1]                                                            | [22]<->[12]                                                      | [22]<->[11]                                                      | [11+12]<->[22]                                                   | common odds ratio                          |
|            |                                                                                                                                                                     |                                                                                                                                                                     | Odds_ratio=0.817<br>C.I.=[0.543-1.229]<br>chi2=0.94<br>p=0.33178 (P) | Odds_ratio=0.950<br>C.I.=[0.460-1.964]<br>chi2=0.02<br>p=0.89081 | Odds_ratio=0.724<br>C.I.=[0.344-1.526]<br>chi2=0.72<br>p=0.39544 | Odds_ratio=0.837<br>C.I.=[0.435-1.610]<br>chi2=0.28<br>p=0.59420 | Odds_ratio=0.848<br>chi2=0.78<br>p=0.37729 |
| rs1861869  | n11=31 (23.82)<br>n12=28 (42.35)<br>n22=26 (18.82)<br>f <sub>a</sub> 1=0.53 +/-0.044<br>F=0.33889<br>p=0.001782 (Pearson)<br>p=0.001612 (Llr)<br>p=0.002133 (Exact) | n11=30 (23.31)<br>n12=38 (51.38)<br>n22=35 (28.31)<br>f <sub>a</sub> 1=0.48 +/-0.039<br>F=0.26039<br>p=0.008225 (Pearson)<br>p=0.007881 (Llr)<br>p=0.009902 (Exact) | Risk allele 2                                                        |                                                                  |                                                                  |                                                                  |                                            |
|            |                                                                                                                                                                     |                                                                                                                                                                     | [1]<->[2]                                                            | [11]<->[12]                                                      | [11+]<->[22]                                                     | [11]<->[12+22]                                                   | common odds ratio                          |
|            |                                                                                                                                                                     |                                                                                                                                                                     | Odds_ratio=1.240<br>C.I.=[0.825-1.862]<br>chi2=1.07<br>p=0.30012 (P) | Odds_ratio=1.402<br>C.I.=[0.696-2.825]<br>chi2=0.90<br>p=0.34325 | Odds_ratio=1.391<br>C.I.=[0.681-2.840]<br>chi2=0.82<br>p=0.36424 | Odds_ratio=1.397<br>C.I.=[0.757-2.579]<br>chi2=1.15<br>p=0.28439 | Odds_ratio=1.180<br>chi2=0.83<br>p=0.36307 |
|            |                                                                                                                                                                     |                                                                                                                                                                     | Risk allele 1                                                        |                                                                  |                                                                  |                                                                  |                                            |
|            |                                                                                                                                                                     |                                                                                                                                                                     | [2]<->[1]                                                            | [22]<->[12]                                                      | [22]<->[11]                                                      | [11+12]<->[22]                                                   | common odds ratio                          |
|            |                                                                                                                                                                     |                                                                                                                                                                     | Odds_ratio=0.807<br>C.I.=[0.537-1.211]<br>chi2=1.07<br>p=0.30012 (P) | Odds_ratio=1.008<br>C.I.=[0.499-2.039]<br>chi2=0.00<br>p=0.98194 | Odds_ratio=0.719<br>C.I.=[0.352-1.468]<br>chi2=0.82<br>p=0.36424 | Odds_ratio=0.856<br>C.I.=[0.463-1.585]<br>chi2=0.24<br>p=0.62097 | Odds_ratio=0.848<br>chi2=0.83<br>p=0.36307 |
| rs17217144 | n11=20 (16.11)<br>n12=34 (41.79)<br>n22=31 (27.11)<br>f <sub>a</sub> 1=0.44 +/-0.041<br>F=0.18637<br>p=0.085745 (Pearson)<br>p=0.085386 (Llr)<br>p=0.082697 (Exact) | n11=28 (24.27)<br>n12=44 (51.46)<br>n22=31 (27.27)<br>f <sub>a</sub> 1=0.49 +/-0.037<br>F=0.14491<br>p=0.141391 (Pearson)<br>p=0.140719 (Llr)<br>p=0.166760 (Exact) | Risk allele 2                                                        |                                                                  |                                                                  |                                                                  |                                            |
|            |                                                                                                                                                                     |                                                                                                                                                                     | [1]<->[2]                                                            | [11]<->[12]                                                      | [11+]<->[22]                                                     | [11]<->[12+22]                                                   | common odds ratio                          |
|            |                                                                                                                                                                     |                                                                                                                                                                     | Odds_ratio=0.817<br>C.I.=[0.543-1.229]<br>chi2=0.94<br>p=0.33178 (P) | Odds_ratio=0.924<br>C.I.=[0.446-1.914]<br>chi2=0.04<br>p=0.83224 | Odds_ratio=0.714<br>C.I.=[0.334-1.527]<br>chi2=0.76<br>p=0.38474 | Odds_ratio=0.824<br>C.I.=[0.425-1.599]<br>chi2=0.33<br>p=0.56730 | Odds_ratio=0.843<br>chi2=0.81<br>p=0.36868 |
|            |                                                                                                                                                                     |                                                                                                                                                                     | Risk allele 1                                                        |                                                                  |                                                                  |                                                                  |                                            |
|            |                                                                                                                                                                     |                                                                                                                                                                     | [2]<->[1]                                                            | [22]<->[12]                                                      | [22]<->[11]                                                      | [11+12]<->[22]                                                   | common odds ratio                          |
|            |                                                                                                                                                                     |                                                                                                                                                                     | Odds_ratio=1.224<br>C.I.=[0.814-1.841]<br>chi2=0.94<br>p=0.33178 (P) | Odds_ratio=1.294<br>C.I.=[0.663-2.528]<br>chi2=0.57<br>p=0.44999 | Odds_ratio=1.400<br>C.I.=[0.655-2.993]<br>chi2=0.76<br>p=0.38474 | Odds_ratio=1.333<br>C.I.=[0.724-2.454]<br>chi2=0.86<br>p=0.35490 | Odds_ratio=1.186<br>chi2=0.81<br>p=0.36868 |
| rs7186521  | n11=30 (27.11)<br>n12=36 (41.79)<br>n22=19 (16.11)<br>f <sub>a</sub> 1=0.56 +/-0.041<br>F=0.13851<br>p=0.201591 (Pearson)<br>p=0.201488 (Llr)<br>p=0.193664 (Exact) | n11=30 (27.79)<br>n12=47 (51.42)<br>n22=26 (23.79)<br>f <sub>a</sub> 1=0.52 +/-0.036<br>F=0.08660<br>p=0.382769 (Pearson)<br>p=0.382512 (Llr)<br>p=0.429829 (Exact) | Risk allele 2                                                        |                                                                  |                                                                  |                                                                  |                                            |
|            |                                                                                                                                                                     |                                                                                                                                                                     | [1]<->[2]                                                            | [11]<->[12]                                                      | [11+]<->[22]                                                     | [11]<->[12+22]                                                   | common odds ratio                          |
|            |                                                                                                                                                                     |                                                                                                                                                                     | Odds_ratio=1.200<br>C.I.=[0.798-1.805]<br>chi2=0.77<br>p=0.38052 (P) | Odds_ratio=1.306<br>C.I.=[0.670-2.543]<br>chi2=0.62<br>p=0.43279 | Odds_ratio=1.368<br>C.I.=[0.628-2.981]<br>chi2=0.62<br>p=0.42920 | Odds_ratio=1.327<br>C.I.=[0.717-2.456]<br>chi2=0.82<br>p=0.36655 | Odds_ratio=1.174<br>chi2=0.69<br>p=0.40550 |
|            |                                                                                                                                                                     |                                                                                                                                                                     | Risk allele 1                                                        |                                                                  |                                                                  |                                                                  |                                            |
|            |                                                                                                                                                                     |                                                                                                                                                                     | [2]<->[1]                                                            | [22]<->[12]                                                      | [22]<->[11]                                                      | [11+12]<->[22]                                                   | common odds ratio                          |
|            |                                                                                                                                                                     |                                                                                                                                                                     | Odds_ratio=0.833<br>C.I.=[0.554-1.253]<br>chi2=0.77<br>p=0.38052 (P) | Odds_ratio=0.954<br>C.I.=[0.458-1.987]<br>chi2=0.02<br>p=0.90003 | Odds_ratio=0.731<br>C.I.=[0.335-1.592]<br>chi2=0.62<br>p=0.42920 | Odds_ratio=0.853<br>C.I.=[0.433-1.677]<br>chi2=0.21<br>p=0.64396 | Odds_ratio=0.851<br>chi2=0.69<br>p=0.40550 |

(Pearson): Pearson's goodness-of-fit chi-square (degrees of freedom=1); (Llr): Log likelihood ratio chi-square (degrees of freedom=1); (Exact): Fisher's Exact test PA, PB: two-tailed p-values; if P, then PA=PB

**Supplementary Table 3.** Statistical and Hardy-Weinberg analyses on the genotyping data of sALS patients and healthy individuals of Turkish origin.

| SNP       | Tests for deviation from Hardy-Weinberg equilibrium                                                                                                     |                                                                                                                                                         | Tests for association (C.I.: 95% confidence interval)                 |                                                                   |                                                                  |                                                                   |                                                                  |
|-----------|---------------------------------------------------------------------------------------------------------------------------------------------------------|---------------------------------------------------------------------------------------------------------------------------------------------------------|-----------------------------------------------------------------------|-------------------------------------------------------------------|------------------------------------------------------------------|-------------------------------------------------------------------|------------------------------------------------------------------|
|           | Controls                                                                                                                                                | Cases                                                                                                                                                   | allele freq. difference                                               | heterozygous                                                      | homozygous                                                       | allele positivity                                                 | Armitage's trend test                                            |
| rs6850200 | n11=13 (9.85)<br>n12=28 (34.30)<br>n22=33 (29.85)<br>f_a1=0.36 +/-0.043<br>F=0.18361<br>p=0.114229 (Pearson)<br>p=0.116119 (Llr)<br>p=0.132161 (Exact)  | n11=19 (17.57)<br>n12=64 (66.85)<br>n22=65 (63.57)<br>f_a1=0.34 +/-0.028<br>F=0.04265<br>p=0.603841 (Pearson)<br>p=0.604834 (Llr)<br>p=0.588753 (Exact) | Risk allele 2                                                         |                                                                   |                                                                  |                                                                   |                                                                  |
|           |                                                                                                                                                         |                                                                                                                                                         | [1]<->[2]                                                             | [11]<->[12]                                                       | [11+]<->[22]                                                     | [11]<->[12+22]                                                    | common odds ratio                                                |
|           |                                                                                                                                                         |                                                                                                                                                         | Odds_ratio=1.093<br>C.I.=[0.724-1.649]<br>chi2=0.18<br>p=0.67320 (P)  | Odds_ratio=1.564<br>C.I.=[0.679-3.599]<br>chi2=1.11<br>p=0.29123  | Odds_ratio=1.348<br>C.I.=[0.593-3.061]<br>chi2=0.51<br>p=0.47520 | Odds_ratio=1.447<br>C.I.=[0.671-3.120]<br>chi2=0.89<br>p=0.34424  | Odds_ratio=1.119<br>chi2=0.16<br>p=0.68634                       |
|           |                                                                                                                                                         |                                                                                                                                                         | Risk allele 1                                                         |                                                                   |                                                                  |                                                                   |                                                                  |
|           |                                                                                                                                                         |                                                                                                                                                         | [2]<->[1]                                                             | [22]<->[12]                                                       | [22]<->[11]                                                      | [11+12]<->[22]                                                    | common odds ratio                                                |
|           |                                                                                                                                                         |                                                                                                                                                         | Odds_ratio=0.915<br>C.I.=[0.606-1.381]<br>chi2=0.18<br>p=0.67320 (P)  | Odds_ratio=1.160<br>C.I.=[0.630-2.137]<br>chi2=0.23<br>p=0.63276  | Odds_ratio=0.742<br>C.I.=[0.327-1.686]<br>chi2=0.51<br>p=0.47520 | Odds_ratio=1.028<br>C.I.=[0.586-1.802]<br>chi2=0.01<br>p=0.92386  | Odds_ratio=0.897<br>chi2=0.16<br>p=0.68634                       |
| rs2892469 | n11=19 (18.50)<br>n12=36 (37.00)<br>n22=19 (18.50)<br>f_a1=0.50 +/-0.042<br>F=0.02703<br>p=0.816153 (Pearson)<br>p=0.816142 (Llr)<br>p=0.818460 (Exact) | n11=36 (39.54)<br>n12=81 (73.92)<br>n22=31 (34.54)<br>f_a1=0.52 +/-0.028<br>F=0.09585<br>p=0.243611 (Pearson)<br>p=0.243211 (Llr)<br>p=0.322762 (Exact) | Risk allele 2                                                         |                                                                   |                                                                  |                                                                   |                                                                  |
|           |                                                                                                                                                         |                                                                                                                                                         | [1]<->[2]                                                             | [11]<->[12]                                                       | [11+]<->[22]                                                     | [11]<->[12+22]                                                    | common odds ratio                                                |
|           |                                                                                                                                                         |                                                                                                                                                         | Odds_ratio=0.935<br>C.I.=[0.630-1.387]<br>chi2=0.11<br>p=0.73712 (P)  | Odds_ratio=1.188<br>C.I.=[0.601-2.345]<br>chi2=0.25<br>p=0.62043  | Odds_ratio=0.861<br>C.I.=[0.388-1.910]<br>chi2=0.14<br>p=0.71295 | Odds_ratio=1.075<br>C.I.=[0.565-2.044]<br>chi2=0.05<br>p=0.82598  | Odds_ratio=0.930<br>C.I.=[0.565-2.044]<br>chi2=0.12<br>p=0.72993 |
|           |                                                                                                                                                         |                                                                                                                                                         | Risk allele 1                                                         |                                                                   |                                                                  |                                                                   |                                                                  |
|           |                                                                                                                                                         |                                                                                                                                                         | [2]<->[1]                                                             | [22]<->[12]                                                       | [22]<->[11]                                                      | [11+12]<->[22]                                                    | common odds ratio                                                |
|           |                                                                                                                                                         |                                                                                                                                                         | Odds_ratio=1.070<br>C.I.=[0.721-1.588]<br>chi2=0.11<br>p=0.73712 (P)  | Odds_ratio=1.379<br>C.I.=[0.690-2.758]<br>chi2=0.83<br>p=0.36250  | Odds_ratio=1.161<br>C.I.=[0.523-2.576]<br>chi2=0.14<br>p=0.71295 | Odds_ratio=1.304<br>C.I.=[0.677-2.510]<br>chi2=0.63<br>p=0.42646  | Odds_ratio=1.075<br>C.I.=[0.677-2.510]<br>chi2=0.12<br>p=0.72993 |
| rs1861869 | n11=0 (0.00)<br>n12=0 (0.00)<br>n22=74 (0.00)<br>f_a1=0.00 +/-0.000<br>F=0.00000<br>p=0.000e+00 (Pearson)<br>p=0.000e+00 (Llr)<br>p=0.000e+00 (Exact)   | n11=0 (0.00)<br>n12=1 (1.00)<br>n22=137 (137.00)<br>f_a1=0.00 +/-0.004<br>F=0.00364<br>p=0.965927 (Pearson)<br>p=0.951915 (Llr)<br>p=1.000000 (Exact)   | Risk allele 2                                                         |                                                                   |                                                                  |                                                                   |                                                                  |
|           |                                                                                                                                                         |                                                                                                                                                         | [1]<->[2]                                                             | [11]<->[12]                                                       | [11+]<->[22]                                                     | [11]<->[12+22]                                                    | common odds ratio                                                |
|           |                                                                                                                                                         |                                                                                                                                                         | Odds_ratio=0.618<br>C.I.=[0.025-15.275]<br>chi2=0.54<br>p=1.11118 (F) | Odds_ratio=3.000<br>C.I.=[0.019-473.058]<br>chi2=nan<br>p=1.00000 | Odds_ratio=1.846<br>C.I.=[0.036-93.961]<br>chi2=nan<br>p=1.00000 | Odds_ratio=1.859<br>C.I.=[0.037-94.642]<br>chi2=nan<br>p=1.00000  | Odds_ratio=1.197<br>chi2=0.54<br>p=0.46294                       |
|           |                                                                                                                                                         |                                                                                                                                                         | Risk allele 1                                                         |                                                                   |                                                                  |                                                                   |                                                                  |
|           |                                                                                                                                                         |                                                                                                                                                         | [2]<->[1]                                                             | [22]<->[12]                                                       | [22]<->[11]                                                      | [11+12]<->[22]                                                    | common odds ratio                                                |
|           |                                                                                                                                                         |                                                                                                                                                         | Odds_ratio=1.617<br>C.I.=[0.065-39.942]<br>chi2=0.54<br>p=1.11118 (F) | Odds_ratio=1.625<br>C.I.=[0.065-40.398]<br>chi2=0.54<br>p=0.46294 | Odds_ratio=0.542<br>C.I.=[0.011-27.584]<br>chi2=nan<br>p=1.00000 | Odds_ratio=1.625<br>C.I.=[0.065-40.398]<br>chi2=0.54<br>p=0.46294 | Odds_ratio=0.858<br>chi2=0.54<br>p=0.46294                       |
| rs1721744 | n11=19 (18.50)<br>n12=36 (37.00)<br>n22=19 (18.50)<br>f_a1=0.50 +/-0.042<br>F=0.02703<br>p=0.816153 (Pearson)<br>p=0.816142 (Llr)<br>p=0.818460 (Exact) | n11=38 (41.11)<br>n12=80 (73.78)<br>n22=30 (33.11)<br>f_a1=0.53 +/-0.028<br>F=0.08425<br>p=0.305394 (Pearson)<br>p=0.305020 (Llr)<br>p=0.409011 (Exact) | Risk allele 2                                                         |                                                                   |                                                                  |                                                                   |                                                                  |
|           |                                                                                                                                                         |                                                                                                                                                         | [1]<->[2]                                                             | [11]<->[12]                                                       | [11+]<->[22]                                                     | [11]<->[12+22]                                                    | common odds ratio                                                |
|           |                                                                                                                                                         |                                                                                                                                                         | Odds_ratio=0.897<br>C.I.=[0.605-1.332]<br>chi2=0.29<br>p=0.59108 (P)  | Odds_ratio=1.111<br>C.I.=[0.565-2.186]<br>chi2=0.09<br>p=0.76022  | Odds_ratio=0.789<br>C.I.=[0.356-1.750]<br>chi2=0.34<br>p=0.56021 | Odds_ratio=1.000<br>C.I.=[0.528-1.894]<br>chi2=0.00<br>p=1.00000  | Odds_ratio=0.891<br>chi2=0.30<br>p=0.58219                       |
|           |                                                                                                                                                         |                                                                                                                                                         | Risk allele 1                                                         |                                                                   |                                                                  |                                                                   |                                                                  |
|           |                                                                                                                                                         |                                                                                                                                                         | [2]<->[1]                                                             | [22]<->[12]                                                       | [22]<->[11]                                                      | [11+12]<->[22]                                                    | common odds ratio                                                |
|           |                                                                                                                                                         |                                                                                                                                                         | Odds_ratio=1.114<br>C.I.=[0.751-1.654]<br>chi2=0.29<br>p=0.59108 (P)  | Odds_ratio=1.407<br>C.I.=[0.701-2.824]<br>chi2=0.93<br>p=0.33514  | Odds_ratio=1.267<br>C.I.=[0.571-2.808]<br>chi2=0.34<br>p=0.56021 | Odds_ratio=1.359<br>C.I.=[0.704-2.623]<br>chi2=0.84<br>p=0.35996  | Odds_ratio=1.122<br>chi2=0.30<br>p=0.58219                       |
| rs7186521 | n11=19 (18.50)<br>n12=36 (37.00)<br>n22=19 (18.50)<br>f_a1=0.50 +/-0.042<br>F=0.02703<br>p=0.816153 (Pearson)<br>p=0.816142 (Llr)<br>p=0.818460 (Exact) | n11=31 (33.58)<br>n12=79 (73.83)<br>n22=38 (40.58)<br>f_a1=0.48 +/-0.028<br>F=0.06996<br>p=0.394706 (Pearson)<br>p=0.394460 (Llr)<br>p=0.509316 (Exact) | Risk allele 2                                                         |                                                                   |                                                                  |                                                                   |                                                                  |
|           |                                                                                                                                                         |                                                                                                                                                         | [1]<->[2]                                                             | [11]<->[12]                                                       | [11+]<->[22]                                                     | [11]<->[12+22]                                                    | common odds ratio                                                |
|           |                                                                                                                                                         |                                                                                                                                                         | Odds_ratio=1.099<br>C.I.=[0.741-1.631]<br>chi2=0.22<br>p=0.63832 (P)  | Odds_ratio=1.345<br>C.I.=[0.672-2.692]<br>chi2=0.70<br>p=0.40176  | Odds_ratio=1.226<br>C.I.=[0.554-2.710]<br>chi2=0.25<br>p=0.61477 | Odds_ratio=1.304<br>C.I.=[0.677-2.510]<br>chi2=0.63<br>p=0.42646  | Odds_ratio=1.105<br>chi2=0.23<br>p=0.63194                       |
|           |                                                                                                                                                         |                                                                                                                                                         | Risk allele 1                                                         |                                                                   |                                                                  |                                                                   |                                                                  |
|           |                                                                                                                                                         |                                                                                                                                                         | [2]<->[1]                                                             | [22]<->[12]                                                       | [22]<->[11]                                                      | [11+12]<->[22]                                                    | common odds ratio                                                |
|           |                                                                                                                                                         |                                                                                                                                                         | Odds_ratio=0.910<br>C.I.=[0.613-1.350]<br>chi2=0.22<br>p=0.63832 (P)  | Odds_ratio=1.097<br>C.I.=[0.557-2.160]<br>chi2=0.07<br>p=0.78826  | Odds_ratio=0.816<br>C.I.=[0.369-1.804]<br>chi2=0.25<br>p=0.61477 | Odds_ratio=1.000<br>C.I.=[0.528-1.894]<br>chi2=0.00<br>p=1.00000  | Odds_ratio=0.905<br>chi2=0.23<br>p=0.63194                       |

(Pearson): Pearson's goodness-of-fit chi-square (degrees of freedom=1); (Llr): Log likelihood ratio chi-square (degrees of freedom=1); (Exact): Fisher's Exact test PA, PB: two-tailed p-values; if P, then PA=PB

**Supplementary Table 4.** *C9orf72* genotyping of Greek ALS patients (second patient cohort)

| <b>Sample ID</b> | <b><i>C9orf72</i> repeats</b> |
|------------------|-------------------------------|
| 1                | 6/9                           |
| 2                | 2/5                           |
| <b>3</b>         | 2/7                           |
| 4                | 5/10                          |
| 5                | 2/2                           |
| 6                | 7/10                          |
| 7                | 2/8                           |
| 8                | 2/5                           |
| 9                | 2/2                           |
| 10               | 2/3                           |
| 11               | 5/6                           |
| 12               | 8/10                          |
| 13               | Inconclusive                  |
| 14               | 2/2                           |
| 15               | 2/8                           |
| 16               | 2/5                           |
| 17               | 2/2                           |
| 18               | 2/2                           |
| 19               | 2/2                           |
| 20               | 2/5                           |
| 21               | 2/8                           |
| 22               | 2/5                           |
| 23               | 2/2                           |
| 24               | 2/4                           |
| 25               | Inconclusive                  |
| <b>26</b>        | <b>2/exp</b>                  |
| 27               | 2/7                           |
| 28               | 2/2                           |
| 29               | 6/11                          |
| 30               | 6/11                          |
| 31               | No amplification              |

Numbers given in the table (column *C9orf72* results) represent the numbers of *C9orf72* hexanucleotide repeats for a given patient. For example, 2/6 means that the patient has 2 repeats on one allele, and 6 repeats on the other. 2/2 means that the patient in question is homozygous for allele 2. For patient 26, 2/exp means that there are 2 repeats on one allele and an expansion on the other. The size of the expansion cannot be defined because we use repeat-primed PCR.
